# Supplementary material for: Lipidomic Analysis of TRPC1 Ca2+-Permeable Channel-Knock Out Mouse Demonstrates a Vital Role in Placental Tissue Sphingolipid and Triacylglycerol Homeostasis Under Maternal High-Fat Diet
Source: Front Endocrinol (Lausanne). 2022 Mar 10;13:854269. doi: 10.3389/fendo.2022.854269 (PMC8960927; doi:10.3389/fendo.2022.854269)
Supplement: Supplementary file 2 [file DataSheet_2.xlsx]

## Sheet: Table S1
Table S1. Dietary formulation for control (NF) and high-fat (HF) diet.
	NF		HF
Ingredient	g/kg	kcal	g/kg	kcal
High Protein Casein	200	800	241	962
Dextrinized Starch	132	528	193	770
Corn Starch	398	1590	108	433
Sucrose	100	400	120	481
Corn Oil	44	396	44	396
Soybean Oil	26	234	26	234
Lard	0	0	171	1540
Cellulose	50	0	39.5	0
Mineral Mix (AIN-93G)	35	31.5	40.4	35.6
Vitamin Mix (AIN-93)	10	39	11.5	45
L-Cystine	3	12	3.5	13.9
Choline Bitartrate	2.5	0	2.9	0
Total	1001	4031	1001	4911
kcal/g	4.03		4.91
Protein (en%)	19.8		19.6
Carbohydrate (en%)	62.5		24
Fat (en%)	16		45

## Sheet: Table S2
Table S2. Class-Based Acquisition Settings and Internal Standards
Class	Acquisition Mode	Standards
		Name	Shorthand
Triacylglycerol	Enhanced mass spectrum (MS1)	Triheptanoin	TAG 51:0
Cholesterol Ester	Neutral loss	Cholesteryl heptadecanoate	CE 17:0
	Precursor ion scan
	m/z = 369
Free Cholesterol	MRM	cholesterol-d7	d7-Chol
Phosphatidylcholine	Precursor ion scan	1-heptadecanoyl-2-(9Z-tetradecenoyl)-sn-glycero-3-phosphocholine	PC 17:0/14:1
	m/z = 184	1-heptadecanoyl-2-(5Z,8Z,11Z,14Z-eicosatetraenoyl)-sn-glycero-3-phosphocholine	PC 17:0/20:4
Phosphatidyl-ethanolamine	Neutral loss	1-heptadecanoyl-2-(9Z-tetradecenoyl)-sn-glycero-3-phosphoethanolamine	PE 17:0/14:1
	141 Da	1-heptadecanoyl-2-(5Z,8Z,11Z,14Z-eicosatetraenoyl)-sn-glycero-3-phosphoethanolamine	PE 17:0/20:4
Ceramide	Precursor ion scan	N-heptadecanoyl-D-erythro-sphingosine	Cer d18:1/17:0
	m/z = 264
Sphingomyelin	Ion-mobility assisted Precursor ion scan	N-heptadecanoyl-D-erythro-sphingosylphosphorylcholine	SM d18:1/17:0
	m/z = 184

## Sheet: Table S3
Table S3. Fatty acid neutral masses for CE analysis
Fatty Acid	Neutral Loss [FA + NH4]0		Fatty Acid	Neutral Loss [FA + NH4]0
14:1	243		22:6	345
14:0	245		22:5	347
16:3	267		22:4	349
16:2	269		22:3	351
16:1	271		22:2	353
16:0	273		22:1	355
17:1	285		22:0	357
17:0 (IS)	287 (IS)		23:0	371
18:4	293		24:6	373
18:3	295		24:5	375
18:2	297		24:4	377
18:1	299		24:3	379
18:0	301		24:2	381
19:1	313		24:1	383
19:0	315		24:0	385
20:5	319		26:6	401
20:4	321		26:5	403
20:3	323		26:4	405
20:2	325		26:3	407
20:1	327		26:2	409
20:0	329		26:1	411
21:0	343		26:0	413

## Sheet: Table S4
Table S4. Concentration of cholesterol ester species (CE C:N) in mouse placenta.
	Wild Type Mice												TRPC1 -/- Mice
	Control Diet						High-Fat Diet						Control Diet						High-Fat Diet
	Mid Gestation (n=8)			Late Gestation (n =8)			Mid Gestation (n=8)			Late Gestation (n =8)			Mid Gestation (n=4)			Late Gestation (n = 8)			Mid Gestation (n=8)			Late Gestation (n =8)
CE C:N	Mean1	s.d.1		Mean1	s.d.1		Mean1	s.d.1		Mean1	s.d.1		Mean1	s.d.1		Mean1	s.d.1		Mean1	s.d.1		Mean1	s.d.1		p	Note2
CE 16:3	0.821429	0.538533		3.245	1.07893		3.88875	0.713051		2.36229	1.19909		0.89975	0.309192		1.6295	1.30448		1.318	0.390661		3.37571	0.999114		1.1699e-07	dfij
CE 16:2	1.8885	0.8623		5.65375	1.18714		6.36429	1.6911		4.03625	1.54986		1.79143	0.495897		3.06125	1.7598		1.8175	0.371248		4.3425	1.20173		3.6356e-07	dfgj
CE 16:1	48.4875	22.4025		145.875	40.5302		120.375	39.8747		78.6	29.1589		54.3875	18.1332		48.975	34.3643		35.475	12.6708		75.325	11.5309		1.7283e-09	cdfgj
CE 16:0	187.5	72.4805		610	132.315		529	136.648		407.5	162.265		175.625	54.1873		272.5	158.509		199	38.79		392.75	66.4374		1.4961e-10	cdfgjk
CE 18:3	7.83625	2.67586		19.8375	2.9012		24.25	4.02137		18.8488	7.49843		9.535	2.40368		13.615	8.68243		10.49	1.23088		22.025	1.83128		2.6558e-09	adfjk
CE 18:2	192.875	56.7436		489.75	116.584		549.375	181.95		427.5	161.581		246.875	53.6215		285.25	109.665		297	63.0502		474.75	57.7921		4.7431e-08	adfgjk
CE 18:1	246.75	112.945		694.625	154.257		623.125	140.095		494.25	194.565		292.75	77.8217		330.625	180.281		284.25	42.003		540.5	84.7163		7.7167e-09	dfgjk
CE 18:0	96.4625	30.2191		290.5	46.5833		270.875	134.084		232.75	82.4669		89.2714	29.9861		165.75	74.015		143.75	38.8791		224.714	40.306		1.0796e-06	dgj
CE 20:5	4.9225	2.83546		9.29	1.32568		12.2912	5.76938		11.2688	4.88212		5.74375	2.12904		8.10625	5.47263		6.67	0.809691		17.1	4.33985		2.21e-06	adk
CE 20:4	268.75	110.841		373.25	64.6811		531.375	113.78		504.75	189.32		311.375	86.8166		373.875	158.527		398	114.446		774.25	132.529		2.5701e-09	adek
CE 20:3	52.0375	20.9457		68.525	12.1623		105.471	24.4597		100.788	36.9475		60.5	14.4301		83.625	28.916		100.125	21.176		137.875	23.8354		1.3725e-06	a
CE 20:2	33.75	19.2241		53.35	13.7017		68.025	23.2753		72.4	34.9554		40.7	14.0937		53.65	26.3398		48.15	7.75134		77.65	15.301		0.0013299	dk
CE 20:1	17.305	7.92397		34.475	7.30024		37.4375	12.1083		34.5875	16.7479		19.5	6.87508		26.5625	16.3199		19.3	2.44813		42.1125	11.7234		0.00015364	dk
CE 22:6	41	24.4595		152.25	18.4913		188.5	62.0207		164.5	76.8019		56.6	12.8711		101.962	63.6821		73.45	6.87144		210.125	40.9265		5.5193e-10	adfjk
CE 22:5	54.1125	20.5423		116.125	7.0799		172.25	62.7438		144.838	90.2675		46.575	16.4463		91.7375	70.8307		47.3	4.59565		204.75	41.1018		5.9534e-08	adfk
CE 22:4	97.5625	37.183		159.625	33.0624		240.625	71.8191		215.413	106.647		112.7	39.9125		141.737	97.3162		141.5	17.7106		306.375	60.1045		4.6379e-07	adk
CE 22:3	7.28375	1.62078		8.83286	1.40052		17.6375	9.38326		11.6086	4.34259		8.42	1.29959		10.1113	4.64635		13.3425	5.61212		16.45	2.92819		0.00015792	d
CE 22:2	10.5137	3.14865		15.225	2.84191		21.5625	6.37337		25.7538	13.1217		12.1887	3.88877		18.6	6.99796		18.6	3.45736		32.25	6.54392		3.6805e-07	adk
CE 22:1	6.86	1.37975		13.7625	3.04487		16.4375	3.24651		16.6088	8.40241		8.1575	1.95282		11.2287	6.38285		8.3175	0.72279		20.7125	4.67102		6.1785e-07	adk
CE 22:0	7.0075	2.05822		13.0288	3.63743		13.3886	5.49081		15.19	7.00231		6.54333	1.74017		11.065	6.09611		9.275	1.36187		17.75	4.00607		5.7685e-05
CE 24:6	2.9225	1.00826		4.13375	0.539337		6.26625	1.64818		5.9425	2.58623		3.0375	1.02461		4.0675	1.51668		4.205	0.361248		7.62625	1.12168		3.2828e-08	adk
CE 24:5	7.91143	2.5835		11.5413	1.37026		21.075	6.63793		17.1112	10.1207		8.07286	2.12623		11.2329	7.76149		8.8725	0.793279		21.4625	4.1802		1.1718e-06	adfk
CE 24:4	19.0875	5.73795		22.2125	3.99801		37.975	8.33165		36.55	16.7549		19.0812	6.33786		23.55	11.7676		23.9	4.42945		46.025	8.45184		2.3798e-07	adk
CE 24:3	3.3025	0.76524		4.5125	1.43044		5.20875	1.60589		6.26571	2.13521		3.37429	0.819855		4.84714	1.45166		4.7925	0.720989		7.43286	1.97738		0.017337
CE 24:2	16.15	3.74776		28.3125	5.11145		38.6125	13.2447		44.575	21.7017		15.7037	4.77016		28.975	12.9107		27.075	4.64498		50.625	9.31385		1.3488e-07	adk
CE 24:1	21.425	5.35877		60.875	9.24457		65.6	21.2209		67.9	36.4605		23.625	6.44199		41.6875	29.8517		27.7	4.68899		73.075	14.3306		6.9094e-07	djk
CE 24:0	15.1437	5.11897		18.3714	2.69797		28.3714	13.2166		29.7857	10.4386		12.4587	4.28694		19.975	7.85271		16.725	4.18838		27.7625	8.34505		0.012644
CE 26:6	0.957571	0.250247		1.10957	0.204804		1.9205	1.32062		1.45525	0.46752		0.875	0.25138		1.395	0.457592		1.519	0.433425		1.91125	0.408077		0.0082715
CE 26:5	8.87333	1.42691		12.5475	3.03932		14.0825	4.10924		11.9125	4.7483		10.672	3.22176		7.81857	3.98163		11.35	3.0348		13.8	3.88072		0.00077838	ad
CE 26:4	5.342	1.11883		6.0375	1.3363		8.42875	1.58411		8.17	4.39749		5.605	1.57685		7.3925	9.08478		5.51667	1.34515		8.89286	0.799077
CE 26:3	1.24767	0.556772		1.58317	0.462247		2.115	0.569235		2.285	0.958306		1.24675	0.345266		1.45	0.333895		1.45	0.242693		2.04667	0.58054		0.02767
CE 26:2	5.65	1.11805		5.47375	1.50006		7.57	3.23317		9.3375	3.82484		5.27125	1.93143		6.395	1.35404		7.6175	1.6178		8.84	1.72207		0.0023444	c
CE 26:1	5.29375	1.40324		6.855	0.761258		8.48375	2.90959		10.3086	4.46329		6.04625	2.16561		6.91375	2.40278		6.685	1.81156		8.71875	2.16632
CE 26:0	8.61714	2.26221		6.8475	1.57038		11.29	11.4352		10.6943	4.50674		6.93125	2.35151		8.09875	1.84768		7.6575	3.39056		8.12375	2.54212
Total CE	1505.65	519.107		3467.64	508.32		3809.25	748.674		3245.85	1224.81		1682.14	419.972		2227.47	1110.75		2012.2	345.014		3881.52	487.271		2.7508e-09	adhjk
Unest. Chol.	12325	1501.19		18587.5	1619.03		14375	1136.1		19612.5	2003.17		12762.5	702.928		19625	1180.5		15500	2552.12		19637.5	1256.91		8.2905e-18	ijkl
1)	Mean and standard deviation are reported in nmol/g tissue wet weight
2)	Significance (p<0.05) was determined by one-way ANOVA with Tukey’s HSD post hoc test to determine differences between groups. Letter code indicates significant relationships:
	a)	TRPC1 -/- -NF-L vs. TRPC1 -/- -HF-L														Diet
	b)	TRPC1 -/- -NF-M vs. TRPC1 -/- -HF-M														Diet
	c)	WT -NF-L vs. WT -HF-L														Diet
	d)	WT -NF-M vs. WT -HF-M														Diet
	e)	WT -HF-L vs. TRPC1 -/- -HF-L														Genotype
	f)	WT -HF-M vs. TRPC1 -/- -HF-M														Genotype
	g)	WT -NF-L vs. TRPC1 -/- -NF-L														Genotype
	h)	WT -NF-M vs. TRPC1 -/- -NF-M														Genotype
	i)	WT -HF-M vs. WT -HF-L														Gesation
	j)	WT -NF-M vs. WT -NF-L														Gesation
	k)	TRPC1 -/- -HF-M vs. TRPC1 -/- -HF-L														Gesation
	l)	TRPC1 -/- -NF-M vs. TRPC1 -/- -NF-L														Gesation

## Sheet: Table S5
Table S5. Triacylglycerol species (TAG C:N) in mouse placenta.
	Wild Type Mice												TRPC1 -/- Mice
	Control Diet						High-Fat Diet						Control Diet						High-Fat Diet
	Mid Gestation (n=8)			Late Gestation (n =8)			Mid Gestation (n=8)			Late Gestation (n =8)			Mid Gestation (n=4)			Late Gestation (n = 8)			Mid Gestation (n=8)			Late Gestation (n =8)
TAG C:N	Mean1	s.d.1		Mean1	s.d.1		Mean1	s.d.1		Mean1	s.d.1		Mean1	s.d.1		Mean1	s.d.1		Mean1	s.d.1		Mean1	s.d.1		p	Note2
TAG 45:0	17.2712	9.04344		21.5129	14.8418		27.31	12.1705		20.075	8.08883		24.7312	16.9497		34.1367	28.8626		33.45	9.82878		16.256	6.91814
TAG 46:2	24.52	10.5766		26.4167	5.39645		19.854	26.2613		30.4167	14.1338		20.0714	5.39559		27.25	5.53203		26.7	N/A		18.3	8.48528
TAG 46:1	13.7417	7.30475		24.2333	9.42649		21.925	12.1387		15.1675	9.19679		21	9.90421		18.1375	10.2828		9.16	4.72347		15.5375	8.22206
TAG 46:0	32.1625	9.68975		36.825	9.93576		50.5	27.577		44.3375	7.29872		34.5375	8.44088		43.1714	7.97469		40.875	12.0242		34.8625	11.0592
TAG 48:2	20.4875	4.79507		21.875	4.98935		25.9229	13.9096		20.125	4.04537		20.5333	5.6369		20.4286	4.91756		12.8967	8.4179		24.6617	11.2351
TAG 48:1	31.6857	12.1191		49.05	9.08059		54.3833	25.3862		40.375	9.825		27.7167	8.19571		36.84	14.6906		34.78	37.0807		31.5	6.55769		0.029147
TAG 48:0	63.0625	10.4896		116.137	22.7579		88.775	38.8496		83.0875	27.9114		55.0625	23.0661		78.1125	41.6028		47.2	17.9605		70.5	22.3613		0.00014816	ej
TAG 50:4	12.26	1.3813		14.1433	3.3306		14.42	2.44683		12.4667	2.46644		14.406	6.06309		14.8433	8.09059		20.9	N/A		10.05	4.7199
TAG 50:3	38.1143	18.6602		43.55	8.84728		39.9625	13.4006		37.6125	6.64195		40.4571	13.8515		36.325	11.3042		40.95	5.44702		30.8157	17.2936
TAG 50:2	113.925	21.3789		143.625	19.9924		122.837	27.8992		117.013	23.0845		109.437	29.7002		109.087	45.3385		84.825	37.6658		104.762	12.7121
TAG 50:1	111.113	21.1141		193	36.4613		156.5	56.0663		159.287	39.0081		122.275	36.7598		139.188	70.7746		81.325	28.4034		125.875	15.8514		0.0011146	j
TAG 52:5	24.6875	4.2475		26.8	4.42461		33.05	11.772		22.8125	3.99551		30.8125	7.48149		21.8625	7.5691		24.675	8.72329		25.35	3.15549		0.026729
TAG 52:4	117.438	25.4974		108.25	14.0544		112.538	22.0674		98.8875	20.0578		128.575	43.5599		102.837	36.7709		107.225	32.104		105.875	13.2308
TAG 52:3	157.375	32.4651		169	14.842		195	46.3249		179.5	33.3809		185.738	66.426		173.375	65.1255		158.75	40.9095		203.625	24.6689
TAG 52:2	221.5	33.9874		276.875	44.2894		289.125	85.3588		282.125	58.9247		228.375	79.4192		269.75	105.233		221.75	58.5057		306	21.4276
TAG 52:1	146.5	15.6479		233.75	46.7325		234.625	88.84		229.375	57.7109		144.987	49.8764		205.838	91.7521		150.5	38.2666		250.25	12.0208		0.0008193
TAG 54:9	12.7333	1.86726		16.925	3.71628		27.25	6.69285		22.3875	7.76465		16.0833	3.60079		19.3286	3.76019		24.9	11.5295		22.425	4.08333		0.00015916	d
TAG 54:7	24.9875	4.15054		25.9375	3.33678		40.3125	8.70623		28.875	5.27386		34.225	6.79322		27.9	6.05852		31.2	12.991		29.8	2.73182		0.00024899	dj
TAG 54:6	114.175	27.0784		80.6125	14.8399		101.787	22.7036		94.7375	13.8244		133.613	41.0575		105.988	37.6215		134.1	38.2924		114.238	13.1896		0.0080329
TAG 54:5	154.875	32.7782		121.112	23.7821		147.625	37.9057		137.375	29.3741		200.388	74.2165		152.438	58.0685		196.75	63.6573		186.875	33.4213		0.01318
TAG 54:4	228.125	46.3263		196.75	46.3118		226.375	66.369		241.375	38.191		273.625	91.7714		256.5	95.3924		310.75	100.284		296	33.4877
TAG 54:3	159.75	23.9449		163.125	28.1396		246.875	76.7955		248.875	44.6108		190.625	61.0525		238.875	88.7363		250.5	71.7983		331.375	38.5225		2.4961e-06	acd
TAG 54:2	122.363	19.5994		167.875	35.3005		219.25	82.6278		205.625	42.5204		119.725	39.8045		186.537	73.6466		164.75	44.9398		277.875	20.986		5.4534e-07	adk
TAG 56:10	12.3583	3.82288		11.8083	1.73159		24.4	6.59957		15.4871	6.2067		15.05	5.10523		17.2	2.25832		22.7333	7.19884		19.7	1.85549		6.3178e-05	di
TAG 56:9	18.7125	3.64826		16.5	3.06408		27.85	6.49241		20.1375	5.02734		22.2714	5.33189		18.3163	6.13506		27.8667	8.48842		25.125	1.93298		0.016683	d
TAG 56:8	96.9625	26.8026		57.3	9.93263		82.525	19.8406		76.175	18.9593		118.737	40.41		80.575	36.9087		138.075	43.1751		111.475	26.8021		0.00011208	f
TAG 56:7	110.625	32.0603		68.925	15.9975		96.7625	32.3682		96.925	28.7382		157	64.4613		99.9125	51.6041		167.75	43.1538		144.788	36.9867		0.00024623	di
TAG 56:6	166.25	49.6926		122.038	38.0319		163.125	44.7132		172.875	42.2828		236.375	81.242		180.088	71.5762		273	80.8497		201.75	28.4944		0.00076991	f
TAG 56:5	126.337	32.6159		113.162	38.7268		128.25	42.9325		139.875	24.7412		182.887	56.1016		141.575	63.3795		193.25	66.1583		159.5	16.3183
TAG 56:4	101.4	24.229		108.9	36.5039		137.85	46.035		134.75	25.9271		131.338	36.2349		143.8	44.5496		174	34.3802		150.25	18.7216
TAG 56:3	41.0625	5.05624		45.5	10.9074		92.5125	28.0767		78.925	18.4722		47.9625	11.8436		74.15	19.5949		82.4	14.8735		101.737	12.773		1.7249e-10	abcde
TAG 56:2	34.45	4.08621		40.1125	5.99343		58.0375	15.1128		48.2625	11.7878		42.0571	9.1179		42.8125	12.2872		53.025	16.7615		65.0125	10.8362		2.2705e-05	ad
TAG 56:1	44.8625	7.09264		56.0375	8.04024		80.625	23.97		56.3375	12.0014		50.7375	10.329		55	9.16235		56.625	21.258		61.975	5.27494		0.00014282	di
TAG 56:0	57.3	13.8094		64.1375	12.1989		104.287	33.8726		80.025	18.9182		62.05	12.2894		69.825	12.6234		81.6	18.0531		82.15	11.573		8.6183e-05	d
TAG 58:11	17.3	2.0702		15.95	3.25181		26.95	5.27907		21.85	7.4239		22.15	4.5754		18.8857	6.01371		29.825	9.17728		24.6125	2.08288		9.3338e-05	d
TAG 58:10	54.1125	21.5049		34.8375	9.06562		49.65	14.4096		46.2875	10.9202		72.125	22.6082		51.825	28.2167		96.75	34.3944		71.9625	22.0014		0.00015773	d
TAG 58:9	64.7375	26.2627		36.7125	9.79992		61.6375	22.3179		54.4	20.6252		90.775	33.5352		58.0625	27.922		101.9	31.3035		90.85	26.0692		8.2905e-18
TAG 58:8	105.662	37.4276		77.85	30.3732		97.9875	32.2528		100.688	19.2997		153.013	49.0664		100.55	47.1757		183	58.2752		120.825	17.1602		0.00023107	f
TAG 58:7	77.4	25.683		60.95	18.3884		82.1	28.8107		79.275	12.2735		127.725	35.9824		78.0625	37.7213		144.75	39.9865		95.5875	13.6913		1.5626e-05	fhkl
TAG 58:6	82.725	26.492		71.9125	20.6411		100.088	22.5116		97.4125	10.4903		131.087	29.4178		99.05	32.592		164	48.9013		101.4	10.9273		5.1809e-06	fhk
TAG 58:5	51.15	16.7472		53.1125	13.7041		80.2875	20.4829		43.0648	43.9131		81.225	14.9851		66.7875	19.2261		97.4	28.4408		75.0625	5.80319		6.3292e-05	dh
TAG 58:4	60.875	10.6032		59.2625	10.1627		111.725	26.7002		83.1375	17.851		82.9625	12.9872		84.75	12.6763		124.375	39.0115		92.05	8.6272		5.1389e-08	bdi
TAG 58:3	28.525	2.74369		31.1375	3.82732		41.3875	9.29215		40.725	10.3133		32.6125	7.72037		36.55	10.1208		43.975	9.65242		48.3875	6.56102		5.9447e-05	d
TAG 58:2	33.75	5.69737		42.7571	3.60317		54.075	14.7573		48.35	9.82301		38.3857	11.7345		43.825	9.01503		46.925	14.2158		54.55	8.83516		0.0019133	d
TAG 58:1	33.6625	7.19145		44.4625	9.80495		64.9	16.4876		54.45	20.8329		44.225	10.9772		46.2625	7.97441		56.125	16.1302		57.3375	6.48866		0.00038826	d
TAG 58:0	53.35	11.4881		50.9875	15.191		92.975	19.658		70.8125	23.5885		62.6875	14.7998		66.45	12.878		92.025	27.2498		72.475	11.5016		5.0524e-05	d
TAG 60:12	24.025	6.50115		20.7375	3.77243		32.8375	6.73051		28.225	4.20671		34.925	6.45462		26.9625	8.44883		50.75	17.6749		36.5875	6.49009		4.4942e-07	bf
TAG 60:11	38.3375	11.0288		29.25	5.6163		44.4875	14.9417		41.8875	9.36688		48.65	14.9876		39.5875	12.8932		68.325	15.963		51.7375	8.6609		0.00012565	f
TAG 60:10	52.875	23.8183		42.15	17.2523		55.925	24.2176		56.475	15.6132		77.625	26.6328		54.9	30.8471		99.025	27.3472		66.575	10.2834		0.0042031
TAG 60:9	47.5125	19.112		35.8125	11.0957		47.1	20.4567		46.0875	11.8036		67.8875	20.7547		46.85	23.2359		72.875	16.8544		55.375	8.84966		0.0064349
Total TAG	3599.17	605.699		3689.68	601.008		4536.54	1075.06		4204.82	558.277		4411.53	1216.46		4161.36	1337.6		4951.26	1256		4823.82	350.931
1)	Mean and standard deviation are reported in nmol/g tissue wet weight
2)	Significance (p<0.05) was determined by one-way ANOVA with Tukey’s HSD post hoc test to determine differences between groups. Letter code indicates significant relationships:
	a)	TRPC1 -/- -NF-L vs. TRPC1 -/- -HF-L
	b)	TRPC1 -/- -NF-M vs. TRPC1 -/- -HF-M
	c)	WT -NF-L vs. WT -HF-L
	d)	WT -NF-M vs. WT -HF-M
	e)	WT -HF-L vs. TRPC1 -/- -HF-L
	f)	WT -HF-M vs. TRPC1 -/- -HF-M
	g)	WT -NF-L vs. TRPC1 -/- -NF-L
	h)	WT -NF-M vs. TRPC1 -/- -NF-M
	i)	WT -HF-M vs. WT -HF-L
	j)	WT -NF-M vs. WT -NF-L
	k)	TRPC1 -/- -HF-M vs. TRPC1 -/- -HF-L
	l)	TRPC1 -/- -NF-M vs. TRPC1 -/- -NF-L

## Sheet: Table S6
Table S6. Phosphatidylcholine species (PC C:N) in mouse placenta
	Wild Type Mice												TRPC1 -/- Mice
	Control Diet						High-Fat Diet						Control Diet						High-Fat Diet
	Mid Gestation (n=8)			Late Gestation (n =8)			Mid Gestation (n=8)			Late Gestation (n =8)			Mid Gestation (n=4)			Late Gestation (n = 8)			Mid Gestation (n=8)			Late Gestation (n =8)
PC C:N	Mean1	s.d.1		Mean1	s.d.1		Mean1	s.d.1		Mean1	s.d.1		Mean1	s.d.1		Mean1	s.d.1		Mean1	s.d.1		Mean1	s.d.1		p	Note2
PC 30:0	47.1625	13.2514		35	8.69006		53.725	12.4982		40.6875	7.21871		32.6375	9.83404		32.7875	11.4058		49.225	14.6632		28.1875	9.85878		0.00012206	k
PC 30:1	24.25	11.7465		41.125	25.3963		31.4375	10.4119		28.9	10.85		19.6029	6.47776		24.28	17.3574		32.65	21.6469		29.6925	18.109
PC 32:0	738.875	179.516		791.125	232.243		883.75	111.758		871.375	96.2733		834	457.712		831	246.824		1097.5	252.767		888.625	218.781
PC 32:1	157.5	22.0324		99.8875	20.4971		168.75	26.5639		97.1625	8.90151		151.812	37.5061		103.688	18.1476		171.25	26.7379		87.5125	17.936		2.4165e-11	ijkl
PC 32:2	19.0125	4.64618		17.1137	4.43133		23.0125	4.04031		18.3714	4.89139		18.1	3.47635		13.9912	3.44138		16.0333	6.56531		18.865	7.35392
PC 34:0	303	106.152		322.875	140.768		429.75	77.2542		433.625	59.6799		309.25	165.504		347.625	117.092		546.25	108.389		405.5	115.148		0.010716	b
PC 34:1	1015.13	181.292		805.875	139.941		1140	80.8879		1065	106.737		947.875	289.141		766.875	164.282		1209	203.611		814.75	161.185		3.5969e-05	k
PC 34:2	676	114.594		703.625	154.342		883.25	92.4627		902.625	135.503		760.625	389.241		633.125	150.098		1036.5	218.287		691	142.622		0.0071384
PC 34:3	35.45	10.8519		33.925	10.4984		43.675	4.83226		39.075	7.70413		45.2375	16.352		35.0875	8.84977		61.2	27.3193		34.6625	12.2376		0.013981	k
PC 34:4	13.7429	2.42065		14.255	5.05794		18.8	8.9848		15.552	3.81988		16.66	5.36405		16.4229	5.65258		13.2	2.54558		12.645	7.96779
PC 36:0	44.85	9.57407		57.075	16.1614		44.825	27.378		31.7287	12.5325		38.8	11.8995		34.7625	7.99981		64.125	52.7214		36.6625	14.6288
PC 36:1	487.875	67.2935		501	123.771		636.125	73.1973		745.625	45.4939		526.125	215.557		434	112.606		614.5	95.4795		583.5	129.201		0.00011012	c
PC 36:2	1395	196.396		1280	346.359		1983.75	199.352		1831.25	203.921		1489.88	605.275		1188.5	241.537		2407.5	448.804		1546.37	398.984		1.5001e-06	bdk
PC 36:3	338.625	49.9369		269.25	82.935		457.25	51.8342		354.375	39.6806		377.375	110.771		256.875	41.7217		505.25	121.393		306.375	93.7016		9.812e-07	kl
PC 36:4	935.75	122.369		992.875	181.311		1089.5	136.063		1103	109.586		1027.5	472.687		901.25	212.966		1250	147.196		1022.25	270.638
PC 36:5	29.8625	6.33064		28.3625	7.25946		31.7375	8.00017		31.375	7.4448		36.45	12.9038		27	8.5219		50	19.4372		26.7625	7.5708		0.0071205	k
PC 38:0	24.4	8.09462		40.9375	14.0168		27.825	5.76684		40.2625	9.93909		32.95	18.3727		30.7	6.348		50.9	26.2266		39.8	13.273
PC 38:1	36.7375	15.4143		58.95	27.8671		48.9875	24.5008		45.6875	14.6423		42.35	35.17		30.45	10.9319		59	28.2806		29.075	15.2115
PC 38:2	79.3125	21.4651		63.2125	28.3266		88.1125	27.0301		75.875	20.8959		68.8125	25.9148		55.1125	14.1411		123	42.1844		66.2375	25.0633		0.0031043	bk
PC 38:3	184.25	42.4693		176.725	49.8716		245	29.9523		209.5	33.6112		177.55	41.9144		154.25	26.4993		304.5	34.8377		166.662	55.0262		1.0386e-06	bk
PC 38:4	1890	315.685		1907.5	562.996		2362.5	160.334		2432.5	317.794		2125.5	822.655		1888.75	476.998		2710	319.479		2308.75	614.967
PC 38:5	318	25.7294		342.375	78.3252		382.375	74.5212		384.875	57.561		385.75	161.414		337.875	78.9348		438.25	64.6394		349.375	74.7318
PC 38:6	253.5	53.8331		305.25	60.4004		331	61.2396		391.5	55.1232		282	150.889		254.375	68.8289		416	131.456		343.875	73.1816
PC 40:0, PC O_42:7	20.6286	6.99898		29.025	7.68463		25.975	5.40971		28.8375	5.31035		32.15	12.8558		27.4625	8.34419		40.45	28.4488		24.0625	7.55833
PC 40:2	26.85	9.30714		28.7375	15.2371		31.0875	8.87974		23.125	7.31705		26.0875	10.7811		22.575	8.58033		45.925	23.6872		22.625	7.57944
PC 40:3	24.3875	7.99472		19.4062	7.89523		29.1571	6.68153		21.4012	7.17024		19.1	9.12652		22	10.073		50.08	52.984		22.1313	7.45678
PC 40:4	139.312	48.7627		99.525	22.8496		162.5	43.9123		146.2	33.2227		117.65	43.6437		110.6	31.6901		233.75	95.3673		115.55	33.5083		0.00018937	bk
PC 40:5	183.5	40.8062		326.125	127.713		219.375	117.601		332.625	64.1982		273.487	258.879		364.65	158.359		213.25	62.4253		330.625	103.16
PC 40:6	311	59.1052		376	101.327		421.625	40.327		543.875	86.9128		360.25	200.864		341	92.9931		587	180.505		505.625	134.131
PC 40:7	60.125	16.5098		61.8625	11.9955		79.8875	12.4838		84.3375	10.0297		78.5125	46.686		61.1625	18.6793		112.9	18.4718		81.0875	25.2734
PC 40:8	39.2375	17.418		50.675	25.2673		46.55	14.5394		51.1625	11.3622		44.3375	27.093		42.9375	16.6467		101.675	40.9938		56.25	18.3551		0.0014336	bfk
PC O_30:0	14.0475	3.71834		16.175	5.31729		16.5287	5.86379		13.0725	5.23899		17.1571	6.78794		18.2875	3.88861		26.7	14.1687		14.0525	4.39744
PC O_32:0	28.885	14.8694		84.0875	39.3672		43.6375	17.7772		78.675	22.1729		81.5286	77.1383		77.075	46.9463		129.025	156.837		91.1875	20.9436
PC O_32:2	12.684	3.40122		18.5286	4.8155		19.9	2.92233		15.2	5.90906		20.5333	12.5962		20.5429	6.67854		47.6625	59.9493		12.7675	4.60299
PC O_34:0	26	8.01784		41.0125	12.7199		31.825	9.21749		51.3	12.0178		44.275	31.4265		47.825	18.3294		48.1	5.54076		50.35	12.3777
PC O_34:1	78.5125	19.4002		110.775	40.5854		104.862	8.19494		142.375	20.3676		117.475	64.2871		121.85	49.5584		140.25	25.4608		137.425	24.7193
PC O_34:2	40.0625	8.48796		44.4	13.3523		39.1375	10.3699		44.75	9.92342		49.9	20.7506		38.825	7.78786		63.9	17.9141		41.1125	15.6401
PC O_34:3	13.7083	4.27533		15.3586	4.92094		13.5175	9.0699		13.4214	4.3002		15.6633	5.62403		12.0267	2.81643		n/a	n/a		12.46	5.95412
PC O_36:0	15.3625	3.4793		17.3025	7.28153		14.2129	4.35643		20.0375	7.0573		16.6488	7.4371		18.975	6.24151		36.775	38.2114		13.15	6.04528
PC O_36:1	24.6125	8.89469		33.3375	13.7873		28.125	4.23919		42.925	9.28113		30.05	18.8898		27.6875	5.41834		27.0667	7.65005		36.3875	7.73904
PC O_36:2	33.2625	6.26098		45.7125	14.3562		46.6875	10.7331		63.8875	9.56309		43.7625	26.8252		43.1375	13.1273		83.3	23.6797		56.925	13.0406
PC O_36:3	16.7012	7.77274		26.9375	10.7709		22.65	8.30026		32.4625	13.1529		24.6637	8.86192		26.3	6.95229		52.95	22.581		25.925	7.54184
PC O_36:4	63.9875	10.7596		85.575	28.4479		82.6125	19.1849		95.6375	20.1578		91.9625	57.9563		94.3625	31.3479		102.6	24.6084		97.45	37.7597
PC O_36:5	62.4125	15.4109		93.1714	34.9083		29.6	46.7486		14.8125	3.39556		60.65	35.7156		24.4667	16.6078		16.1	n/a		27.1825	40.4864
PC O_38:2	12.88	3.83952		21.8625	6.10034		19.8	4.51316		26.6125	4.79447		24.225	11.7208		23.2375	8.43868		43.925	31.5371		18.85	4.30216
PC O_38:3	42.2571	31.9072		34.5	14.7588		27.9786	16.5974		35.1286	25.8324		35.5333	17.404		44.3857	33.0415		124.033	157.215		25.4833	16.2042
PC O_38:5	55.025	8.10339		103.75	30.4683		76.8	27.7979		88.8875	11.1027		92.7125	57.8924		92.9375	35.7269		94.875	9.86285		96.3875	25.5302
PC O_40:5	25.85	7.88887		48.5	18.921		33.525	10.1768		30.5125	6.45942		43.6625	34.189		46.6875	15.8664		38.075	12.8782		38.825	13.126
PC O_40:6	20.4875	5.05751		50.7375	21.8362		33.45	17.0261		46.4375	18.0539		39.6	25.8218		43.3	17.4674		50.525	37.9668		52.175	15.4641
Total PC	10440.1	1582.27		10771.4	2420.82		13106.1	833.52		13277.6	1053.73		11548.4	4878.52		10213.1	2408.61		15736.7	2417.73		11843.2	2798.6		0.012727	k
1)	Mean and standard deviation are reported in nmol/g tissue wet weight
2)	Significance (p<0.05) was determined by one-way ANOVA with Tukey’s HSD post hoc test to determine differences between groups. Letter code indicates significant relationships:
	a)	TRPC1 -/- -NF-L vs. TRPC1 -/- -HF-L
	b)	TRPC1 -/- -NF-M vs. TRPC1 -/- -HF-M
	c)	WT -NF-L vs. WT -HF-L
	d)	WT -NF-M vs. WT -HF-M
	e)	WT -HF-L vs. TRPC1 -/- -HF-L
	f)	WT -HF-M vs. TRPC1 -/- -HF-M
	g)	WT -NF-L vs. TRPC1 -/- -NF-L
	h)	WT -NF-M vs. TRPC1 -/- -NF-M
	i)	WT -HF-M vs. WT -HF-L
	j)	WT -NF-M vs. WT -NF-L
	k)	TRPC1 -/- -HF-M vs. TRPC1 -/- -HF-L
	l)	TRPC1 -/- -NF-M vs. TRPC1 -/- -NF-L

## Sheet: Table S7
Table S7. Phosphatidylethanolamine (PE C:N) in mouse placenta
	Wild Type Mice												TRPC1 -/- Mice
	Control Diet						High-Fat Diet						Control Diet						High-Fat Diet
	Mid Gestation (n=8)			Late Gestation (n =8)			Mid Gestation (n=8)			Late Gestation (n =8)			Mid Gestation (n=4)			Late Gestation (n = 8)			Mid Gestation (n=8)			Late Gestation (n =8)
PE C:N	Mean1	s.d.1		Mean1	s.d.1		Mean1	s.d.1		Mean1	s.d.1		Mean1	s.d.1		Mean1	s.d.1		Mean1	s.d.1		Mean1	s.d.1		p	Note2
PE 34:2	74.1875	15.0946		84.975	25.0601		73.85	19.4125		82.1625	15.509		78.425	30.9606		58.8	11.7316		96.225	27.6389		55.025	19.7577		0.018346	k
PE 34:1	95.5125	20.5619		76.0875	21.4504		93.3875	6.33954		83.7	14.7933		94.0875	34.6386		58.7125	12.9867		95.6	42.1641		63.4875	23.4456
PE 34:0	35.9571	16.0568		37.8714	18.712		49.1125	17.9466		35.4429	12.8808		44.9857	15.2245		44.2625	17.1973		53.6333	12.7771		33.46	10.4687
PE O_36:5	38.9571	8.44292		34.1	13.7178		55.4667	17.2865		44.82	16.4322		38.85	14.0334		45.38	24.1084		52.4	36.3453		21.1333	2.07926
PE O_36:4	40.7	14.7291		45.5167	16.4981		38.4667	12.1638		41.525	13.294		33.0667	6.98307		21.3	n/a		41.5	n/a		31.28	6.53582
PE O_36:3	30.5	12.6857		35.1833	18.3385		38.3	n/a		26.835	21.0206		42.06	20.4123		36	12.1713		77.1	n/a		30	13.9456
PE O_36:2	32.525	11.9263		31.775	6.41632		35.84	5.59982		37.9333	12.7357		38.9	12.7045		37.05	16.5628		69.8667	54.7628		26.05	6.12038
PE O_36:1	31.98	7.67053		29.9	13.646		43.2714	10.3232		37.2	17.4875		41.2	8.45261		41.14	18.8018		36.3	10.4652		30.0167	9.99788
PE 36:5	33.975	10.5576		41.9125	8.93939		37.9	14.0561		28.0833	5.90912		42.22	20.8014		36.48	20.7295		89.8333	61.2334		17.425	7.10041		0.010831	k
PE 36:4	140.438	39.4674		167.275	38.5802		170.125	57.9937		155.25	22.3143		152.862	92.0489		129.562	24.8617		164	26.8701		121.85	49.4061
PE 36:3	78.1875	17.6405		72.375	19.5365		79.8625	18.2043		77.2375	14.984		81.925	31.89		58.675	10.9575		95.3667	16.3891		70.7875	22.6323
PE 36:2	411.375	53.5242		311.875	38.2602		497.5	85.9152		437.375	107.52		385.375	131.223		285.375	48.9488		523.75	191.679		306.625	65.1195		2.0285e-05	k
PE 36:1	200.375	38.6558		143.75	25.8554		224.625	73.3308		198.875	48.4899		209.125	70.9918		145.037	46.7496		254.75	86.9612		146.537	43.0262		0.0023719	k
PE 36:0	30.6125	7.51844		34.0667	13.796		40.1571	15.512		25.0714	13.232		36.7125	11.1181		23.2333	10.1109		57.5	27.1581		28.4929	16.1928
PE O_38:6	41.5	17.5147		36.3286	7.94328		41.2	11.4829		37.025	13.1121		53.675	30.9015		35.3286	13.5211		65.5	37.6897		32.76	10.8572
PE O_38:5	56.5	20.7167		47.975	14.9178		43.98	12.5701		30.7	13.7853		46.0857	13.7268		41.0667	22.0149		131.3	140.997		49.7	25.131
PE O_38:2	26.86	17.4058		34.75	15.0052		30.6667	13.5914		30.62	19.6896		41.9	19.1555		39.5333	16.7923		108.925	139.467		34.6667	16.92		0.023489	bfk
PE 38:6	187.875	31.8678		239	72.3898		265.375	72.4982		269.125	57.07		200.5	110.6		155.9	47.5673		219.75	73.036		169.625	78.2467
PE 38:5	197.375	31.9729		286.75	80.1102		183.75	108.773		247	46.2972		254.5	192.453		193.362	68.4612		230	62.3271		188.125	67.2977
PE 38:4	1101.25	181.516		989.625	125.482		1123.75	230.771		1056.62	125.333		1208	480.823		848.25	208.891		1311.25	449.673		939.5	213.408
PE 38:3	118.125	32.5843		72.6375	31.0006		128.913	45.5007		91.25	21.6615		117.138	31.7073		84.6875	32.6859		164.9	62.6741		68.4	22.3185		0.00011001	k
PE 38:2	61.55	25.7011		43.5857	16.5173		57.9	18.4269		43.7375	14.0277		52.2143	13.8775		42.9857	17.4615		73.5333	3.12143		34.9286	17.674
PE 38:1	37.8857	17.7823		43.0333	16.4242		50.0625	12.2002		31.9429	5.89318		49.0167	18.5437		51.2	35.5809		47.0333	21.9948		34.2571	3.63357
PE 38:0, PE O_40:7	46.475	15.5804		47.6625	17.5675		53.075	13.9777		44.5	11.0047		62.6875	19.657		46.7125	14.1497		109.475	100.399		45.0875	11.5048		0.015677	bfk
PE O_40:6	37.1571	6.7027		50.8875	14.9917		45.3625	11.8075		52.3125	10.0324		61.5714	29.3001		43.6667	12.0256		40.4333	17.8063		44.1143	18.6676
PE O_40:5	43.5	14.3502		45.875	13.7296		39.85	7.73067		44	12.5116		59.9143	22.8238		52.0125	20.7847		96.5	103.741		33.6125	15.8506		0.0264	bfk
PE O_40:4	56.075	19.6554		46.1	16.9038		54.2375	22.648		58.825	8.14296		52.525	23.8894		53.4714	25.1837		109.925	79.5664		38.9571	16.1826		0.007994	bfk
PE O_40:1, PE 40:8	215.2	82.4537		233.5	75.2159		267.714	41.6162		267.25	48.8811		244	75.7971		262.125	50.4025		318.333	51.5978		232.75	65.3381
PE 40:7	861.875	131.228		854.125	201.333		956.375	291.593		1060.88	106.209		940	404.049		719	184.579		1061.5	281.109		937	111.179
PE 40:6	4320	967.545		4606.25	1181.4		5513.75	1656.13		5903.75	543.164		4727.5	2112.78		3965	1317.07		5032.5	1406.73		5402.5	629.348
PE 40:5	2653.75	578.025		4196.25	1420.49		2777.5	2763.44		3670	1023.27		3568.75	3647.47		4218.75	2165.03		1507.5	405.74		3648.75	676.45
PE 40:4	2043.75	683.54		1154	274.607		2191.25	220.806		1302.5	227.643		1637.5	399.705		1057.88	385.271		2210	494.166		1077.62	185.422		4.3456e-09	ijk
PE O_42:6	183.286	31.5368		185.186	103.287		235.667	89.7433		192.857	47.0299		210.2	58.8787		185.857	46.8737		552	288.5		191.057	84.356
PE O_42:5	180.9	50.945		198	101.433		240.829	102.415		248	24.3173		286.667	114.594		194.857	33.2036		430.5	215.668		188	60.1554
PE O_42:3	213.487	77.6957		231.429	143.62		218.75	64.0329		259	81.978		237	38.8587		203.286	89.892		192.333	94.733		176.714	40.401
PE 42:3	140.7	55.6485		175.4	84.1029		181.971	52.9403		232.333	58.9802		243.857	65.1624		174.167	58.5779		186.5	45.9619		230.5	96.0226
Total PE	14100.4	2561.51		14965	2735.72		16179.8	5010.93		16485.7	1119.37		15675	7261.8		13690.1	4107.51		15907.5	3056		14780.8	1514.9
	1)	Mean and standard deviation are reported in nmol/g tissue wet weight
	2)	Significance (p<0.05) was determined by one-way ANOVA with Tukey’s HSD post hoc test to determine differences between groups. Letter code indicates significant relationships:
		a)	TRPC1 -/- -NF-L vs. TRPC1 -/- -HF-L
		b)	TRPC1 -/- -NF-M vs. TRPC1 -/- -HF-M
		c)	WT -NF-L vs. WT -HF-L
		d)	WT -NF-M vs. WT -HF-M
		e)	WT -HF-L vs. TRPC1 -/- -HF-L
		f)	WT -HF-M vs. TRPC1 -/- -HF-M
		g)	WT -NF-L vs. TRPC1 -/- -NF-L
		h)	WT -NF-M vs. TRPC1 -/- -NF-M
		i)	WT -HF-M vs. WT -HF-L
		j)	WT -NF-M vs. WT -NF-L
		k)	TRPC1 -/- -HF-M vs. TRPC1 -/- -HF-L
		l)	TRPC1 -/- -NF-M vs. TRPC1 -/- -NF-L

## Sheet: Table S8
Table S8. Sphingolipid species in mouse placenta.
	Wild Type Mice												TRPC1 -/- Mice
	Control Diet						High-Fat Diet						Control Diet						High-Fat Diet
	Mid Gestation (n=8)			Late Gestation (n =8)			Mid Gestation (n=8)			Late Gestation (n =8)			Mid Gestation (n=4)			Late Gestation (n = 8)			Mid Gestation (n=8)			Late Gestation (n =8)
	Mean1	s.d.1		Mean1	s.d.1		Mean1	s.d.1		Mean1	s.d.1		Mean1	s.d.1		Mean1	s.d.1		Mean1	s.d.1		Mean1	s.d.1		p	Note2
SM 34:1	40.5625	11.1373		80.85	15.6513		30.1875	5.58504		57.2625	7.3671		38.5775	15.8842		51.9375	15.0557	64.2393	69.05	21.4044	2.28737	93.375	12.3758	1.63065	1.7945e-13	abcefgij
SM 34:2	1.35225	0.527219		3.04	0.910651		1.95375	0.623789		2.87375	0.942579		2.062	0.857777		2.205	0.783308		2.81667	0.529182		3.9575	0.561268		2.3099e-06	ajk
SM 36:1	4.05625	1.11295		7.6675	1.83776		3.67625	0.634056		7.79875	3.22206		2.56612	1.01397		5.2275	0.906559		6.63	2.62023		8.89625	2.16001		3.1869e-08	aijk
SM 36:2	0.713	0.0445084		0.7982	0.272982		0.943625	0.313039		1.36	0.426802		0.994	n/a		0.918	0.422945		0.7055	0.242538		1.46513	0.488598		3.5745e-06	kl
SM 40:1	10.2263	2.65624		37.85	7.75316		10.9213	2.9692		30.775	9.7864		8.64375	4.18496		27.85	10.5258		16.575	3.08909		31.9375	5.67625		6.8626e-14	ijkl
SM 42:1	25.5	5.76938		104.025	19.7496		25.6125	5.15542		85.55	12.8383		17.3938	7.52598		65.1	12.5988		33.325	6.54745		70.7125	12.3045		1.1369e-22	cgijkl
SM 42:2	22.875	7.17988		53.2875	11.0384		29.6375	3.75573		64.025	9.32734		19.8575	7.389		48.4625	11.1844		33.5	7.41125		68.4	8.0157		4.0057e-18	aijkl
SM 42:3	11.795	2.91329		15.2088	4.56174		19.0625	3.19595		26.275	5.86436		10.96	4.48539		19.3	4.94397		24.9	7.1129		27.4875	3.75136		1.4726e-10	abcdil
Total SM	117.08	27.5234		302.727	52.8762		121.995	15.4371		275.92	38.4735		101.055	40.1798		221.001	53.0701		187.502	47.4746		306.231	39.3125		1.3216e-17	abgijkl
CER d18:1_16:0	81.275	15.9876		59.4625	12.7238		164.375	24.0413		100.463	21.2722		81.275	30.7386		119.162	21.2957		158.5	12.2338		92.775	11.7281		4.1559e-14	bcdgikl
CER d18:1_18:0	3.99125	0.760609		4.50375	0.87268		8.78875	2.39237		7.34	1.42384		3.48143	0.645431		6.255	2.3259		6.5375	1.05066		5.055	1.61014		2.3903e-08	bcdl
CER d18:1_20:0	1.48286	0.352217		1.72614	0.910742		2.9325	1.78792		1.8675	0.660341		1.07575	0.2488		1.93812	1.05637		1.835	0.374767		1.66286	0.349748		0.0021252	df
CER d18:1_22:0	7.3275	1.40533		12.62	5.01954		16.075	3.30314		14.4375	4.11302		5.865	1.87959		14.7	5.3144		14.6	0.80829		11.375	1.95941		4.7658e-07	bdl
CER d18:1_24:2	6.9825	1.94708		4.42875	1.40233		16.9875	3.28913		9.535	2.24249		9.06	1.83213		9.03625	2.83476		15.425	1.29196		8.12875	1.18615		2.8737e-13	bcdgik
CER d18:1_24:1	11.955	1.7152		13.4325	2.36653		23.5625	3.00568		21.425	3.968		13.995	5.53691		22.4	5.05964		24.475	3.46639		18.125	4.07913		6.2787e-09	bcdgl
CER d18:1_24:0	13.95	3.74204		22.6375	7.62963		25.2125	5.68669		26.2125	4.97693		9.3525	4.11283		25.8	7.80366		21.325	2.53163		20.1	4.12207		1.4455e-07	bdl
CER d18:1_23:0	1.04329	0.423773		2.2275	0.812083		1.67887	0.522334		2.26875	0.807897		1.221	0.616262		3.04	1.51344		2.29667	0.927811		2.48625	1.12746		0.00016194	l
Total Cer	128.007	21.2576		121.039	29.6063		259.613	33.1977		183.549	26.9926		125.326	45.1029		202.332	40.9921		244.994	13.9949		159.708	20.3211		3.3777e-13	bcdgikl
HexCer 34:1	15.735	8.35035		4.06375	1.9572		16.0137	7.74675		5.85125	4.19039		22.28	12.1427		8.27625	2.65953		13.3075	10.7474		7.61125	1.57948		0.00043103	j
HexCer 40:1	1.70029	0.539383		1.15775	0.582971		1.78	0.897329		0.806833	0.253185		1.71757	0.48415		1.02571	0.431345		1.841	1.22106		0.815667	0.359979		0.014539
HexCer 42:2	2.14957	1.31404		0.81475	0.227372		2.01425	0.866956		0.96775	0.625579		3.10143	1.39576		1.1895	0.609159		2.12	1.35765		1.085	0.266679		0.00025056	l
HexCer 42:3	1.027	0.34		1.09775	0.46256		1.06271	0.445676		0.694167	0.161285		1.37657	0.540664		1.0315	0.689556		1.72533	1.18431		0.732333	0.238205
Total HexCer	20.6119	10.2832		7.134	2.28846		20.8707	9.04196		8.32	4.54034		28.4756	16.4822		11.523	4.05184		18.9938	11.3573		10.2443	1.93909		0.00016645	jl
1)	Mean and standard deviation are reported in nmol/g tissue wet weight
2)	Significance (p<0.05) was determined by one-way ANOVA with Tukey’s HSD post hoc test to determine differences between groups. Letter code indicates significant relationships:
	a)	TRPC1 -/- -NF-L vs. TRPC1 -/- -HF-L
	b)	TRPC1 -/- -NF-M vs. TRPC1 -/- -HF-M
	c)	WT -NF-L vs. WT -HF-L
	d)	WT -NF-M vs. WT -HF-M
	e)	WT -HF-L vs. TRPC1 -/- -HF-L
	f)	WT -HF-M vs. TRPC1 -/- -HF-M
	g)	WT -NF-L vs. TRPC1 -/- -NF-L
	h)	WT -NF-M vs. TRPC1 -/- -NF-M
	i)	WT -HF-M vs. WT -HF-L
	j)	WT -NF-M vs. WT -NF-L
	k)	TRPC1 -/- -HF-M vs. TRPC1 -/- -HF-L
	l)	TRPC1 -/- -NF-M vs. TRPC1 -/- -NF-L

## Sheet: Table S9
Table S9. Confirmatory MSn for identification of select PC and PE species.
	Ion Mass	Identification
ESI+	810.6	[PC 38:4 + H]+
ESI-	868.6	[PC 38:4 + OAc]-
MS2 [868.6] ESI-	795.6	[PC 38:4 - CH3- OAc]-
MS3 [795.6] ESI-	528.4	[PC 38:4 - CH3- OAc- FA 18:0]-
	508.4	[PC 38:4 - CH3- OAc- FA 20:4]-
	303.3	[FA 20:4]-
	283.3	[FA 18:0]-
	259.3	[FA 20:4 - CO2]-
ESI+	768.6	[PE 38:4 + H]+
ESI-	826.6	[PE 38:4 + OAc]-
MS2 [826.6] ESI-	303.3	[FA 20:4]-
	259.3	[FA 20:4 - CO2]-
ESI+	794.6	[PE 40:5 + H]+
ESI-	852.6	[PE 40:5 + OAc]-
MS2 [852.6] ESI-	331.2	[FA 22:4]-
	303.2	[FA 20:4]-
	259.3	[FA 20:4 - CO2]-
ESI+	792.6	[PE 40:6 + H]+
ESI‑	850.6	[PE 40:6 + OAc]-
MS2 [850.6] ESI-	329.2	[FA 22:5]-
	303.2	[FA 20:4]-
	285.2	[FA 22:5 - CO2]-
	281.3	[FA 18:1]-
	259.3	[FA 20:4 - CO2]-
ESI+	790.6	[PE 40:6 + H]+
ESI-	848.6	[PE 40:6 + OAc]-
MS2 [848.6] ESI-	327.2	[FA 22:6]-
	303.2	[FA 20:4]-
	283.2	[FA 22:6 - CO2]-
	281.3	[FA 18:1]-
	279.3	[FA 18:2]-
	259.3	[FA 20:4 - CO2]-
